# Supplementary material for: Low Risk of Occult Hepatitis B Infection among Vietnamese Blood Donors
Source: MDPI journal article supplement (doi:10.3390/pathogens11121524), 2022-12-13
Supplement: s1 [file s1]

**Table S1.** Primer sequences for HBV genotyping.

| Primer  | Sequence (5' – 3')       |
|---------|--------------------------|
| HBV-022 | TGCTGCTATGCCTCATCTTC     |
| HBV-065 | CACAGATAACAAAAAATTGG     |
| HBV-066 | CAAAGACAAAAGAAAATTGG     |
| HBV-024 | CAAGGTATGTTGCCCGTTTGTCTT |
| HBV-041 | GGACTCAMGATGYTGACACAG    |
| HBV-064 | GGACTCACGATGCTGTACAG     |

Primer 22,65,66 are used for outer PCR and 24,41,64 for inner PCR

**Table S2.** MEGA11 calculated parameter model for phylogenetic tree construction.

| Model    | #Param | BIC         |
|----------|--------|-------------|
| GTR+G+I  | 115    | 43875,22159 |
| GTR+G    | 114    | 43901,52895 |
| HKY+G+I  | 111    | 44001,49089 |
| TN93+G+I | 112    | 44004,5065  |
| K2+G+I   | 108    | 44011,90295 |
| T92+G+I  | 109    | 44013,23805 |
| HKY+G    | 110    | 44014,5537  |
| TN93+G   | 111    | 44015,32172 |
| K2+G     | 107    | 44025,263   |
| T92+G    | 108    | 44026,81607 |
| GTR+I    | 114    | 44208,39446 |
| HKY+I    | 110    | 44296,81056 |
| TN93+I   | 111    | 44301,57063 |
| K2+I     | 107    | 44306,5673  |
| T92+I    | 108    | 44308,25793 |
| JC+G+I   | 107    | 44919,28712 |
| JC+G     | 106    | 44928,83522 |
| JC+I     | 106    | 45192,69854 |
| GTR      | 113    | 46778,54906 |
| TN93     | 110    | 46915,54949 |
| HKY      | 109    | 46916,86083 |
| K2       | 106    | 46920,15131 |
| T92      | 107    | 46926,47696 |
| JC       | 105    | 47766,69872 |
